# Supplementary material for: Bifunctional aligned hexagonal/amorphous tungsten oxide core/shell nanorod arrays with enhanced electrochromic and pseudocapacitive performance
Source: Royal Society of Chemistry journal article supplement (doi:10.1039/c9ta03725j), 2019-01-01
Supplement: c9ta03725j1.pdf [file c9ta03725j1.pdf]

## Supplementary Information

### Bifunctional aligned hexagonal/amorphous tungsten oxide core/shell nanorod arrays with enhanced electrochromic and pseudocapacitive performance

Xiangtao Huo,<sup>a</sup> Huanyu Zhang,<sup>a</sup> Weiguo Shen,<sup>a</sup> Xiwang Miao,<sup>a</sup> Mei Zhang<sup>a</sup> and Min Guo<sup>\*a</sup>

<sup>a</sup> School of Metallurgical and Ecological Engineering, University of Science and Technology

Beijing, Beijing 100083, P. R. China.

E-mail: guomin@ustb.edu.cn; Fax: +86-10-6233-4926

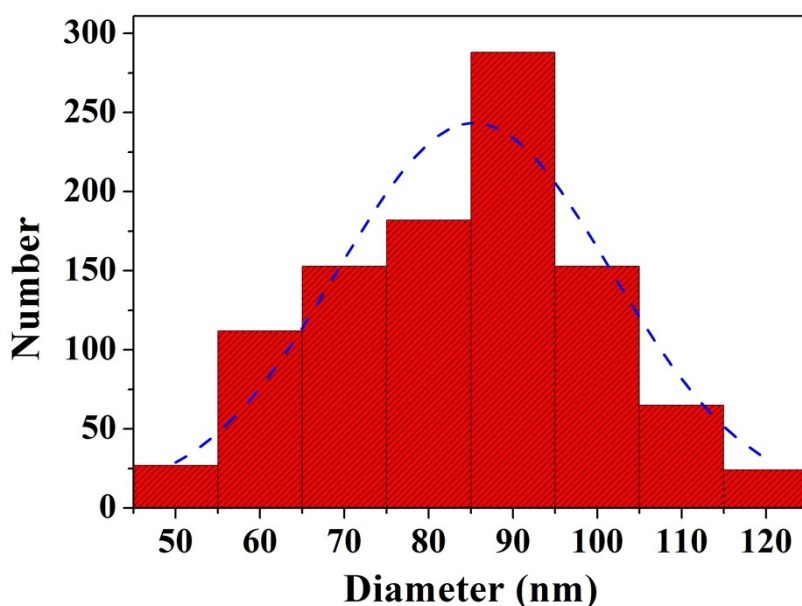

Fig. S1 Statistics of diameter distribution of the h-WNRAs.

Fig. S1 illustrates the diameter distribution of the h-WNRAs. It can be seen that the average diameter of nanorods obtained by hydrothermal growth is about  $85 \pm 15$  nm, and over 75% of the nanorods fall into the range from 70 to 100 nm, which suggests that well-aligned  $\text{WO}_3$  nanorods with uniform diameter can be fabricated.

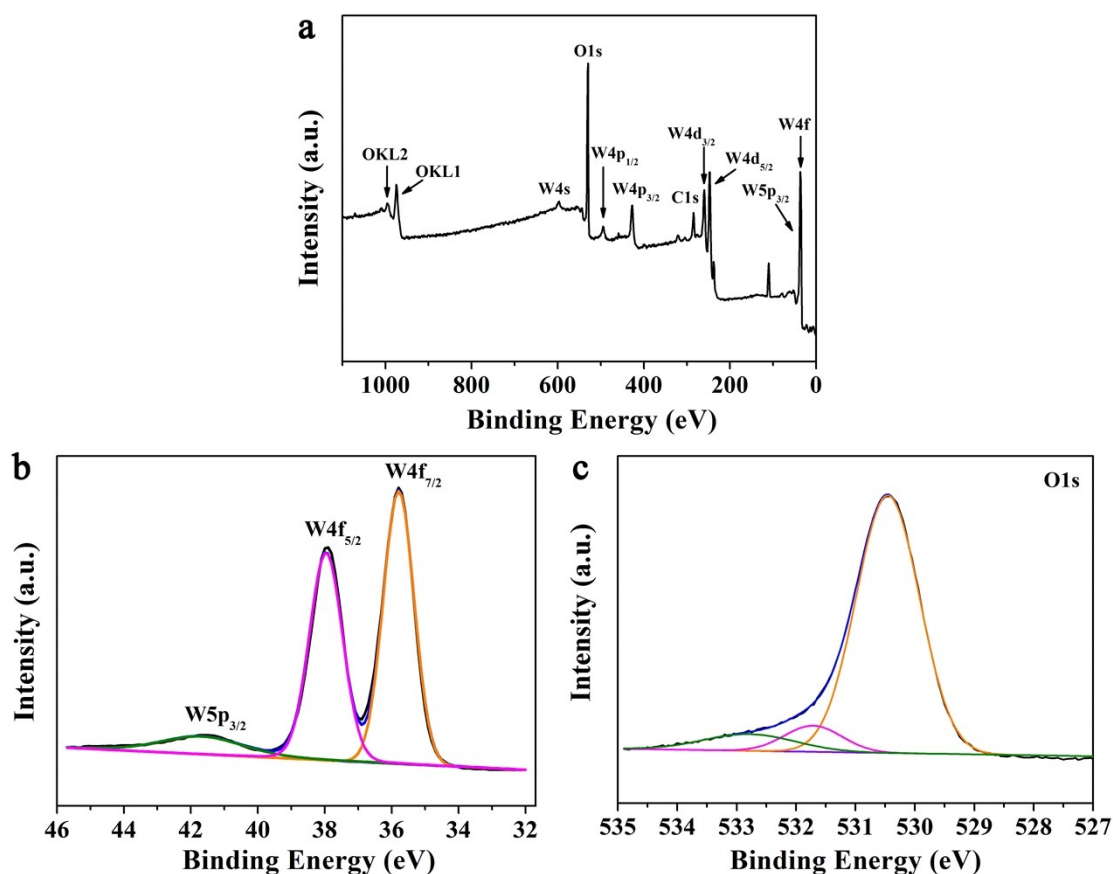

Fig. S2 XPS spectra for the WT 250-0.15: (a) full spectrum, (b) W4f and W5p, (c) O1s.

Fig. S2 illustrates the XPS spectra of WT 250-0.15, from the full spectrum (Fig. S2a), we can see that the main elements in nanorod arrays are W and O, which is consistent with the XRD results (Fig. 3 in the main article). Besides, according to the W4f and W5p core level spectrum in Fig. S2b, three peaks are in good separation located at 41.5 eV, 37.9 eV and 35.8 eV, corresponding to W 5p<sub>3/2</sub>, W 4f<sub>5/2</sub> and W 4f<sub>7/2</sub>, respectively. These values match well with those reported in the previous literature<sup>1,2</sup>, which can be reasoned that W in the nanorod arrays is at the highest oxidation state (W<sup>6+</sup>). This demonstrates that the pure phase WO<sub>3</sub> grow on the FTO glass, which is consistent with the XRD results (Fig. 3 in the main article). Moreover, from the O1s core level spectrum (Fig. S2c), three peaks located at 530.5, 531.7 and 532.9 eV represent oxygen species in different ways, respectively. These values coincide with those of WO<sub>3</sub> reported previously.<sup>3,4</sup> The component located at 530.5 eV was assigned to oxygen atom (O<sup>2-</sup>)

that formed a strong bond in the manner W=O. The second peak at 531.7 eV might belong to a small amount hydroxyl group (OH<sup>-</sup>) on the WO<sub>3</sub> surface. The third peak located at 532.9 eV may be the oxygen from the atmospheric water molecule that absorbed on the WO<sub>3</sub> surface.<sup>3,4</sup>

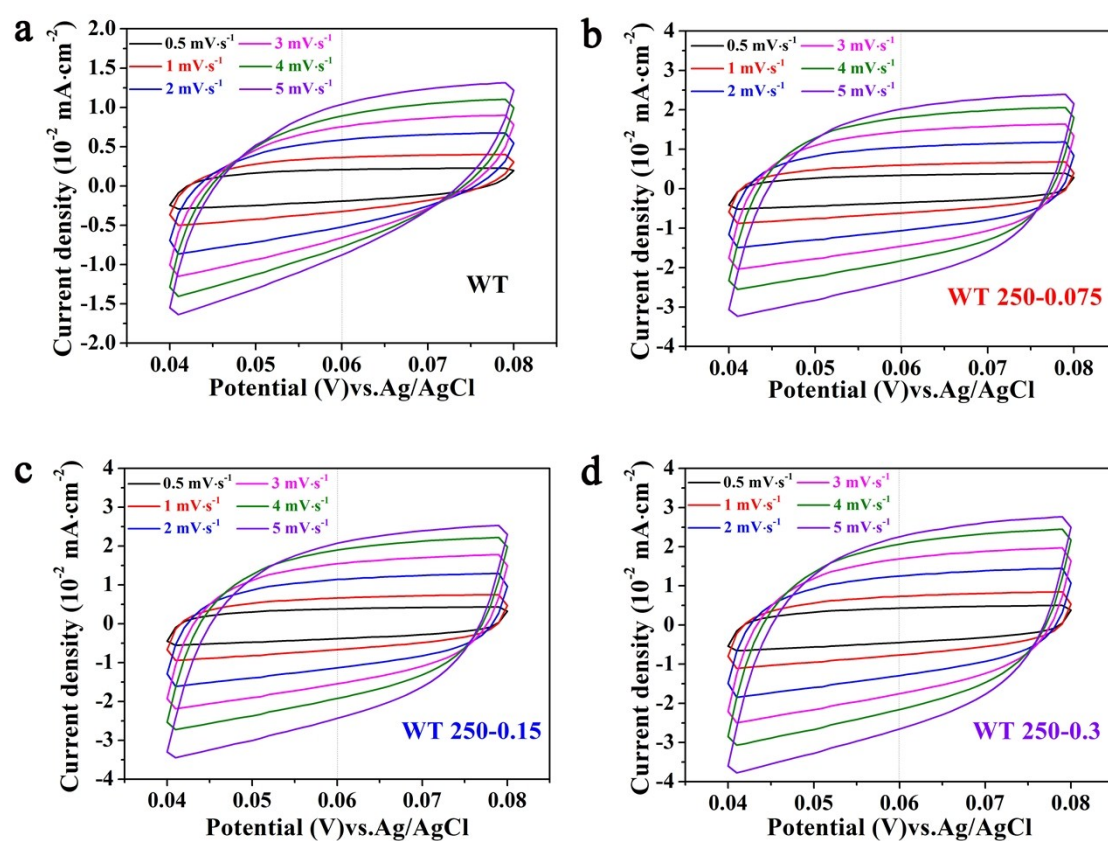

Fig. S3 The capacitive currents from double layer charging for various samples: (a) WT, (b) WT 250-0.075, (c) WT 250-0.15 and (d) WT 250-0.3.

The specific surface areas of the four samples were tested by cyclic voltammetry,<sup>5, 6</sup> that is to say, by measuring the pure double layer capacitances of the four samples within a tiny potential range in CV curves, the specific surface areas can be calculated according to the following formulas (1-2). The CV curves for measuring the pure double layer capacitances are as shown in Fig. S3. And results show that the specific surface areas (electrochemically active surface area (ECSA) of WNRA) per unit

geometric area (GA) of the FTO glass,  $\text{cm}^2_{(\text{ECSA})}/\text{cm}^2_{(\text{GA})}$ ) of the four samples are calculated to be  $41.2 \text{ cm}^2_{(\text{ECSA})}/\text{cm}^2_{(\text{GA})}$ ,  $91.3 \text{ cm}^2_{(\text{ECSA})}/\text{cm}^2_{(\text{GA})}$ ,  $94 \text{ cm}^2_{(\text{ECSA})}/\text{cm}^2_{(\text{GA})}$  and  $102.7 \text{ cm}^2_{(\text{ECSA})}/\text{cm}^2_{(\text{GA})}$ , respectively. It is obvious that the specific surface area of nanorods becomes larger by coating amorphous tungsten oxide. Detailed analysis are as follows:

The capacitive currents were measured in a tiny potential range where no Faraday process occurred, that is, there was no pseudocapacitive effect emerging. Only double layer capacitance was generated within the potential range, while its value only depends on the capacitive characteristics of the material itself and the size of its surface area. Therefore, the specific surface area of a specific material can be obtained by measuring its pure double layer capacitance.

The specific capacitance for a flat surface in aqueous solution is usually found to be about  $20\text{--}60 \mu\text{F}\cdot\text{cm}^{-2}$ . In the following calculations of WT samples, we assume  $40 \mu\text{F}\cdot\text{cm}^{-2}$  as a moderate value. By testing the pure double layer capacitance (i.e., only nonfaradic process happened), we can convert it into specific area by the following formulas <sup>5</sup>:

$$A_{\text{ECSA/GA}} = \frac{C_{\text{GA}}}{40 \mu\text{F}\cdot\text{cm}^{-2} \text{ per cm}^2_{(\text{ECSA})}} \quad (1)$$

where  $A_{\text{ECSA/GA}}$  is the specific surface area (electrochemically active surface area (ECSA) of WNRA) per unit geometric area (GA) of the FTO glass,  $\text{cm}^2_{(\text{ECSA})}/\text{cm}^2_{(\text{GA})}$ ,  $C_{\text{GA}}$  is the specific capacitance (capacitance of electrically active materials per unit geometric area of FTO glass,  $\text{F}/\text{cm}^2_{(\text{GA})}$ ),  $40 \mu\text{F}\cdot\text{cm}^{-2} \text{ per cm}^2_{(\text{ECSA})}$  stands for double layer capacitance per unit ECSA of WNRA.

Herein, we measured the capacitive currents at a potential range in which no faradic process was observed, i.e., at  $0.04\text{--}0.08 \text{ V}$  versus  $\text{Ag}/\text{AgCl}$ . The CV curves ( $0.5\text{--}$

5 mV·s<sup>-1</sup>) of the four samples were measured by using a three-electrode system (FTO glass that coated with WNRA as working electrode, Pt wire as counter electrode, Ag/AgCl as reference electrode). Meanwhile, 1 mol·L<sup>-1</sup> H<sub>2</sub>SO<sub>4</sub> was used as electrolyte.

The specific capacitance can be calculated by the following formula according to the literature <sup>7</sup>:

$$C_{GA} = \frac{1}{2v\Delta V} \int_{V_0}^{V_0+\Delta V} \frac{I}{A_{GA}} dV \quad (2)$$

where  $C_{GA}$  represents the specific capacitance (capacitance of electrically active materials per unit geometric area of FTO glass, F/cm<sup>2</sup><sub>(GA)</sub>);  $A_{GA}$  represents the total geometric area of FTO glass (cm<sup>2</sup><sub>(GA)</sub>);  $v$  is the scan rate (mV/s);  $\Delta V$  represents the potential range of test (V);  $V_0$  is the initial potential (V);  $I$  represents the response current (A).

As shown in the Fig. S3, the approximately rectangular CV curves are obtained, which conform to the characteristics of double-layer capacitance. It can be concluded that only double-layer effect emerged in the samples within this potential range. The data obtained at the scan rate of 5 mV·s<sup>-1</sup> is selected as the final result. Sample WT is taken as an example, the calculation process of specific surface area is as follows:

Firstly, the specific double layer capacitance ( $C_{GA}$ ) can be calculated according to the formula 2, here  $\frac{I}{A_{GA}}$  (i.e. current density),  $V_0$  (initial potential=0.04 V),  $\Delta V$  (potential range=0.04 V) and  $v$  (scan rate=0.005 V·s<sup>-1</sup>) are as shown in the Fig. S3a.

Bringing these values into the formula 2  $C_{GA} = \frac{1}{2 \times 0.005 \times 0.04} \int_{0.04}^{0.04+0.04} \frac{I}{A_{GA}} dV$ , the specific double layer capacitance ( $C_{GA}$ ) is calculated to be  $1.648 \times 10^{-3}$  F/cm<sup>2</sup><sub>(GA)</sub>.

Secondly, the specific surface area ( $A_{ECSA/GA}$ ) could be calculated by the formula (1)

$A_{\text{ECSA/GA}} = \frac{1.648 \times 10^{-3} \text{ F/cm}^2_{(\text{GA})}}{40 \mu\text{F cm}^{-2} \text{ per cm}^2_{(\text{ECSA})}}$ , and the final value is  $41.2 \text{ cm}^2_{(\text{ECSA})}/\text{cm}^2_{(\text{GA})}$ . The

specific areas of other three samples are calculated by the same method, and finally the specific surface areas of the four samples are calculated to be about  $41.2 \text{ cm}^2_{(\text{ECSA})}/\text{cm}^2_{(\text{GA})}$ ,  $91.3 \text{ cm}^2_{(\text{ECSA})}/\text{cm}^2_{(\text{GA})}$ ,  $94 \text{ cm}^2_{(\text{ECSA})}/\text{cm}^2_{(\text{GA})}$  and  $102.7 \text{ cm}^2_{(\text{ECSA})}/\text{cm}^2_{(\text{GA})}$ , respectively. It is obvious that the specific surface areas of the nanorod arrays become larger by coating amorphous tungsten oxide films.

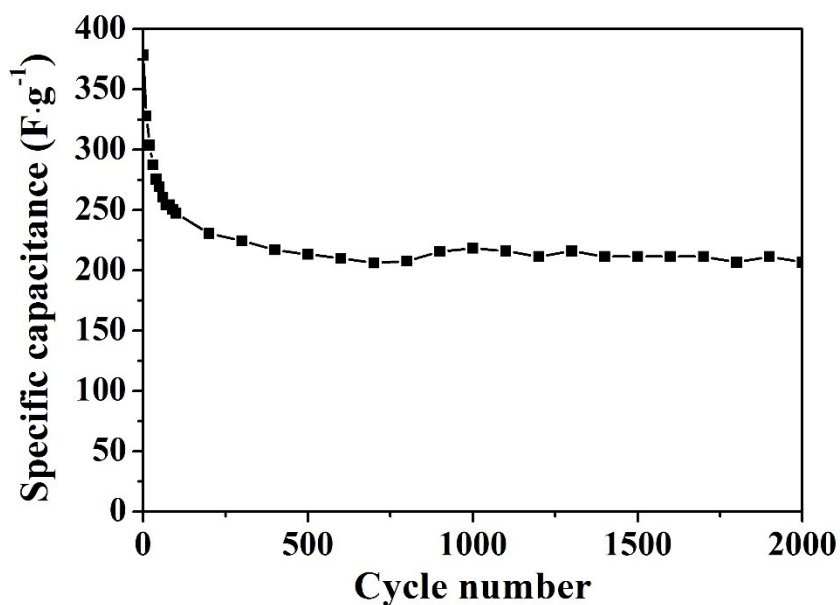

Fig. S4. Cycle performance of the sample WT 250-0.15 measured at  $10 \text{ A} \cdot \text{g}^{-1}$  for 2000 cycles.

The results of constant current charge-discharge cycle test (Fig. S4) is similar to that obtained by CV method in the main article (Fig. 7a). Both of them have an activation process in the initial cycle stage, and then remain basically stable. Compared with the initial value, the specific capacitance still retains 57.8% even after 2000 cycles.

## Notes and references

- 1 D. Zhou, D. Xie, F. Shi, D.H. Wang, X. Ge, X.H. Xia, X.L. Wang, C.D. Gu and J.P. Tu, *J. Colloid Interf. Sci.*, 2015, **460**, 200-208.
- 2 Y. Shimizu, A.C. Bose, D. Mariotti, T. Sasaki, K. Kirihara, T. Suzuki, K. Terashima and N. Koshizaki, *Jpn. J. Appl. Phys.* 2006, **45**, 8228-8234.
- 3 W.K. Man, H. Lu, L.C. Ju, F. Zheng, M. Zhang and M. Guo, *Rsc Adv.*, 2015, **5**, 106182-106190.
- 4 V. V. Kondalkar, S. S. Mali, R. R. Kharade, R. M. Mane, P. S. Patil, C. K. Hong, J. H. Kim, S. Choudhury and P. N. Bhosale, *RSC Adv.*, 2015, **5**, 26923–26931.
- 5 C.Y. Tang, W. Wang, A.K. Sun, C.K. Qi, D.Z. Zhang, Z.Z. W and D.Z. Wang, *ACS Catal.*, 2015, **5**, 6956-6963.
- 6 X.D. Wen, L. Bai, M. Li, and J.Q. Guan, *ACS Sustainable Chem. Eng.*, 2019, **7**, 9249–9256.
- 7 L. Wang, Y. L. Zheng, Q. Y. Zhang, L. Zuo, S. L. Chen, S. H. Chen, H. Q. Hou and Y. H. Song, *RSC Adv.*, 2014, **4**, 51072-51079.
